# Supplementary material for: SARS-CoV-2 viral persistence in lung alveolar macrophages is controlled by IFN-γ and NK cells
Source: PubMed Central journal article supplement (PMC10681903; doi:10.1038/s41590-023-01661-4), 2023-11-02
Supplement: 41590_2023_1661_MOESM1_ESM.pdf [file 41590_2023_1661_MOESM1_ESM.pdf]

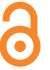

# **SARS-CoV-2 viral persistence in lung alveolar macrophages is controlled by IFN- $\gamma$ and NK cells**

---

In the format provided by the authors and unedited

---

**Antibody used for flow analysed**

| Extrac         | Fluorochrome           | Providers       | Clone        | Isotype  | Reference   | Control       | NHP Cross reactivity    | Dilution |
|----------------|------------------------|-----------------|--------------|----------|-------------|---------------|-------------------------|----------|
| NKG2A (CD159a) | PE                     | Coulter         | Z199         | IgG2b    | IM3291U     | Isotype + FMO | Providers + NHP reagent | 1/30     |
| CD3ε           | ECD/PE-C594            | BD Biosciences  | SP34,2       | IgG1, λ  | 562406      | Isotype + FMO | Providers + NHP reagent | 1/15     |
| CD16           | BUV496                 | BD Biosciences  | 3G8          | IgG1, κ  | 612944      | Isotype + FMO | Providers + NHP reagent | 1/20     |
| CD45           | BUV395                 | BD Biosciences  | D058-1283    | IgG1, κ  | 564099      | Isotype + FMO | Providers + NHP reagent | 1/30     |
| CD4            | PerCp-Cy5              | BD Biosciences  | L200         | IgG1, κ  | 552838      | Isotype + FMO | Providers + NHP reagent | 1/15     |
| CD336 (NKP44)  | PC7                    | Miltenyi Biotec | REA1163      | IgG1     | 130-120-359 | Isotype + FMO | Providers + NHP reagent | 1/20     |
| CD337 (NKP30)  | APC                    | Miltenyi Biotec | REA823       | IgG1     | 130-112-431 | Isotype + FMO | Providers + NHP reagent | 1/20     |
| CD107a         | A700                   | BD Biosciences  | H4A3         | IgG1, κ  | 561340      | Isotype + FMO | Providers + NHP reagent | 1/10     |
| NKp80          | APC Vio® 770           | Miltenyi Biotec | REA845       | IgG1     | 130-112-593 | Isotype + FMO | Providers + NHP reagent | 1/20     |
| CD226          | BV605                  | BD Biosciences  | DX11         | IgG1, κ  | 742495      | Isotype + FMO | Providers + NHP reagent | 1/15     |
| CD20           | BV711                  | BD Biosciences  | 2H7          | IgG2b, κ | 563126      | Isotype + FMO | Providers + NHP reagent | 1/30     |
| CD103          | BV650                  | BD Biosciences  | Ber-ACT8     | IgG1, κ  | 743653      | Isotype + FMO | Providers + NHP reagent | 1/20     |
| KI-67          | AF®488                 | BD Biosciences  | B56          | IgG1, κ  | 561165      | Isotype + FMO | Providers + NHP reagent | 1/20     |
| GZMB           | V450                   | BD Biosciences  | GB11         | IgG1, κ  | 561151      | Isotype + FMO | Providers + NHP reagent | 1/15     |
| IFN-γ          | BV510                  | BD Biosciences  | B27          | IgG1, κ  | 563287      | Isotype + FMO | Providers + NHP reagent | 1/20     |
| IL-17          | BV786                  | BioLegend       | BL168        | IgG1, κ  | 512337      | Isotype + FMO | Providers + NHP reagent | 1/20     |
| CD4            | PE-Cy™7                | BD Biosciences  | L200         | IgG1, κ  | 560644      | Isotype + FMO | Providers + NHP reagent | 1/20     |
| CD8            | VioBlue®               | Miltenyi Biotec | Bw135/80     | IgG2aκ   | 130-113-162 | Isotype + FMO | Providers + NHP reagent | 1/30     |
| CD7            | BV650                  | BD Biosciences  | M-T701       | IgG1, κ  | 740565      | Isotype + FMO | Providers + NHP reagent | 1/15     |
| HLA-DR         | AF®700                 | BD Biosciences  | L243 (G46-6) | IgG2a, κ | 560743      | Isotype + FMO | Providers + NHP reagent | 1/20     |
| CD20           | BV711                  | BD Biosciences  | 2H7          | IgG2b, κ | 563126      | Isotype + FMO | Providers + NHP reagent | 1/20     |
| CD45RA         | BV786                  | BD Biosciences  | 5H9          | IgG1, κ  | 741010      | Isotype + FMO | Providers + NHP reagent | 1/20     |
| CD34           | BUV737                 | BD Biosciences  | 563          | IgG1, κ  | 741868      | Isotype + FMO | Providers + NHP reagent | 1/15     |
| EOMES          | FITC                   | Invitrogen      | WD1928       | IgG1, κ  | 11-4877-42  | Isotype + FMO | Providers + NHP reagent | 1/30     |
| T-bet          | PerCP/Cy5.5            | SONY            | 4B10         | IgG1, κ  | RT3824030   | Isotype + FMO | Providers + NHP reagent | 1/10     |
| IL-21          | AF®647                 | BD Biosciences  | 3A3-N2.1     | IgG1     | 562043      | Isotype + FMO | Providers + NHP reagent | 1/40     |
| IFN-γ          | APC/Cy7                | SONY            | B27          | IgG1, κ  | RT3132620   | Isotype + FMO | Providers + NHP reagent | 1/15     |
| CD20           | A700                   | BD Biosciences  | 2H7          | IgG2b, κ | 560631      | Isotype + FMO | Providers + NHP reagent | 1/30     |
| CD34           | BUV737                 | BD Biosciences  | 563          | IgG1, κ  | 741868      | Isotype + FMO | Providers + NHP reagent | 1/20     |
| CD45RA         | BV786                  | BD Biosciences  | 5H9          | IgG1, κ  | 741010      | Isotype + FMO | Providers + NHP reagent | 1/20     |
| CD7            | BV650                  | BD Biosciences  | M-T701       | IgG1, κ  | 740565      | Isotype + FMO | Providers + NHP reagent | 1/20     |
| CCR7           | APC/Cy7                | BioLegend       | G043H7       | IgG2a, κ | 353211      | Isotype + FMO | Providers + NHP reagent | 1/15     |
| CXCR3 (CD183)  | PE-Cy™7                | BD Biosciences  | 1C6          | IgG1, κ  | 560831      | Isotype + FMO | Providers + NHP reagent | 1/30     |
| CD44           | BUV661                 | BD Biosciences  | G44-26       | IgG2b, κ | 741615      | Isotype + FMO | Providers + NHP reagent | 1/20     |
| CD127          | PE-Cy5                 | Invitrogen      | eBioRDR5     | IgG1 κ   | 15-1278-42  | Isotype + FMO | Providers + NHP reagent | 1/20     |
| GATA-3         | BV421/450              | BD Biosciences  | L50-823      | IgG1, κ  | 563349      | Isotype + FMO | Providers + NHP reagent | 1/20     |
| T-bet          | PerCP/Cy5.5            | SONY            | 4B10         | IgG1, κ  | RT3824030   | Isotype + FMO | Providers + NHP reagent | 1/20     |
| CD14           | alexa 488, FITC, BB515 | Miltenyi Biotec | TÜK4         | IgG2aκ   | 130-113-146 | Isotype + FMO | Providers + NHP reagent | 1/10     |
| MHC-E          | PE                     | NOVUS           | 3D12MHLA-E   | IgG1, κ  | NBP2-00277  | Isotype + FMO | Providers + NHP reagent | 1/30     |
| CD206          | ECD                    | BD Biosciences  | 19.2         | IgG1, κ  | 564063      | Isotype + FMO | Providers + NHP reagent | 1/20     |
| IL-10          | PC7                    | BioLegend       | JES3-9D7     | IgG1, κ  | 501419      | Isotype + FMO | Providers + NHP reagent | 1/20     |
| CD64           | APC                    | BD Biosciences  | 10,1         | IgG2b, κ | 561189      | Isotype + FMO | Providers + NHP reagent | 1/15     |
| CD11C          | BV605                  | BD Biosciences  | S-HCL-3      | IgG2b, κ | 744436      | Isotype + FMO | Providers + NHP reagent | 1/20     |
| NKG2c          | Vio® Bright R720       | Miltenyi Biotec | REA205       | IgG2b, κ | 130-130-663 | Isotype + FMO | Providers + NHP reagent | 1/10     |
| CD163          | BV421/450              | BioLegend       | GHI/61       | IgG1, κ  | 333619      | Isotype + FMO | Providers + NHP reagent | 1/20     |

**Antibody used for Immunostaining**

| Target | Primary antibody | Secondary antibody | Providers      | Clone     | Reference    | Dilution  |
|--------|------------------|--------------------|----------------|-----------|--------------|-----------|
| NSP3   | Yes              | No                 | abcam          | na        | ab283958     | 1/300     |
| dsRNA  | Yes              | No                 | Millipore      | rJ2       | MABE1134     | 1/250     |
| SPIKE  | Yes              | No                 | see method     | Cv2.3194  | Reference 49 | 1/500     |
| ACTIN  | No               | No                 | ThermoFisher   | na        | A12379       | providers |
| MHC-E  | Yes              | No                 | Invitrogen     | MEM-E/0   | MA1-19356    | 1/250     |
| IL-10  | Yes              | No                 | BD bioscience  | JES3-19F1 | 554704       | 1/150     |
| IFNγ   | Yes              | No                 | eBioscience    | MD-1      | 16-7317-81   | 1/200     |
| IL-18  | Yes              | No                 | ATLAS antibody | na        | HPA003980    | 1/200     |
| IL-1b  | Yes              | No                 | abcam          | na        | ab2105       | 1/200     |
| IL-23  | Yes              | No                 | abcam          | B-Z23     | ab84471      | 1/300     |
